# Supplementary material
Source: publisher figshare collection journal article supplement (https://gsajournals.figshare.com/ndownloader/files/14515286)
Supplement: Supplementary file 1 [file 14515286]

## Sheet: Hoja1
Table S2. Number of loci, prevalence (k), and heritability (h2) values for all traits and diseases considered in this study. h2 gwas refers to that estimated from the GWAS Catalog, and h2 fam are estimates from family or population studies. References for k and h2 fam values are also given.
Average number of loci is 96.5 ± 12.4. Average values of heritability explained by the loci and the family studies are 0.127 ± 0.024 and 0.543 ± 0.029 respectively. The average heritability explained by the variants considered is 28.2% ± 0.8.
* Heritabilities calculated using Jaquard's formula (Jacquard, A. Heritability: One word, three concepts. Biometrics. 39(2), 465-466 (1983)).
** Heritabilities assumed to equal that of the closest trait in terms of gene similarity.
Functional domain	Trait	num loci	h2 gwas	k	h2 fam	reference (k)	reference (h2 fam)
Cancer	Basal cell carcinoma	38	0.019	0.0034	0.01 *	Goldenberg, G. et al. Incidence and prevalence of basal cell carcinoma (BCC) and locally advanced BCC (LABCC) in a large commercially insured population in the United States: A retrospective study. J. Am. Acad. Dermatol. 75 (5), 957-966 (2016).	Milán, T. et al. Hereditary factors in basal cell carcinoma of the skin: A population-based cohort study in twins. British Journal of Cancer. 78(11), 1516-1520 (1999).
	Chronic lymphocytic leukemia	38	0.031	0.0004	0.21	Ghia, P. et al. Chronic lymphocytic leukemia. Critical Reviews in Oncology/Hematology. 64 (3), 234-246 (2007).	Lichtenstein, P. et al. Environmental and heritable factors in the causation of cancer - Analyses of cohorts of twins from Sweden, Denmark, and Finland. The New England Journal of Medicine. 343, 78-85 (2000).
	Colorectal cancer	46	0.017	0.004	0.12-0.35	Jiao, S. et al. Estimating the heritability of colorectal cancer. Human Molecular Genetics. 23(14), 3898-3905 (2014).	Jiao, S. et al. Estimating the heritability of colorectal cancer. Human Molecular Genetics. 23(14), 3898-3905 (2014).
	Lung cancer	68	0.089	0.2912	0.26	Ervik, M. et al. Cancer today. Lyon, France: International Agency for Research on Cancer. Cancer Today. Available from: http://gco.iarc.fr/today, accessed 10/02/2018 (2016).	Lichtenstein, P. et al. Environmental and heritable factors in the causation of cancer - Analyses of cohorts of twins from Sweden, Denmark, and Finland. The New England Journal of Medicine. 343, 78-85 (2000).
	Prostate cancer	106	0.232	0.14	0.57	Lleo, A. et al. Primary biliary cholangitis: a comprehensive overview. Hepatol Int. 11, 485-499 (2017).	Mucci, L.A. et al. Familial risk and heritability of cancer among twins in nordic countries. JAMA. 315(1), 68-76 (2016).
	Prostate-specific antigen levels	35	0.151	-	0.45	-	Bansal, A. et al. Heritability of Prostate-Specific Antigen and relationship with zonal prostate volumes in aging twins. J. Clin. Endocrinol. Metab. 85(3), 1272-1276 (2000).
	Testicular germ cell tumor	53	0.049	0.005	0.49	Litchfield, K. et al. Quantifying the heritability of testicular germ cell tumour using both population-based and genomic approaches. Sci. Rep. 5, 13889 (2015).	Litchfield, K. et al. Quantifying the heritability of testicular germ cell tumour using both population-based and genomic approaches. Scientific reports. 5, 13889 (2015).
Cardiovascular	Atrial fibrillation	32	0.025	0.0095	0.62	Go, A.S. et al. Prevalence of diagnosed atrial fibrillation in adults: national implications for rhythm management and stroke prevention: the AnTicoagulation and Risk Factors in Atrial Fibrillation (ATRIA) study. JAMA. 285 (18), 2370-2375 (2001).	Christophersen, I.E. et al. Familial aggregation of atrial fibrillation: A study in danish twins. Circulation: Arrhytmia and Electrophysiology. 2, 378-383 (2008).
	Coronary artery disease	47	0.034	0.074	0.38-0.57**	Zachariah, G. et al. Prevalence of coronary artery disease and coronary risk factors in Kerala, South India: A population survey - Design and methods. Indian Heart Journal. 65, 243-249 (2013).	Zdravkovic, S. et al. Heritability of death from coronary heart disease: a 36-year follow-up of 20966 swedish twins. Journal of Internal Medicine. 252(3), 247-254 (2002).
	Coronary heart disease	38	0.035	0.0547	0.38-0.57	Lloyd-Jones, D. et al. Heart Disease and Stoke Statistics - 2009 Update. Circulation. 119(3), e21-e181 (2009).	Zdravkovic, S. et al. Heritability of death from coronary heart disease: a 36-year follow-up of 20966 swedish twins. Journal of Internal Medicine. 252(3), 247-254 (2002).
	Myocardial infarction	30	0.026	0.0257	0.38-0.57**	Ran, C. et al. A replication study of GWAS findings in migraine identifies association in a Swedish case-control sample. BMC Medical Genetics. 15, 38 (2014).	Zdravkovic, S. et al. Heritability of death from coronary heart disease: a 36-year follow-up of 20966 swedish twins. Journal of Internal Medicine. 252(3), 247-254 (2002).
Dermatological	Atopic dermatitis	32	0.043	0.105	0.75	DaVeiga, S.P. Epidemiology of atopic dermatitis: a review. Allergy Asthma Proc. 33 (3), 227-234 (2012)	Elmose, C. and Thomsen, S.F. Twin studies of atopic dermatitis: Interpretations and applications in the Filaggrin Era. Journal of Allergy. Volume 2015, Article ID 902359 (2015).
	Psoriasis	51	0.106	0.011	0.66	Tsoi, L.C. et al. Identification of 15 new psoriasis susceptibility loci highlights the role of innate immunity. Nature Genetics. 44(12), 1341-1350 (2012).	Grjibovski, A.M. et al. Psoriasis in Norwegian twins: Contribution of genetic and environmental effects. J. Eur. Acad. Dermatol. Venereol. 21(10), 1337-1343 (2007).
	Vitiligo	60	0.096	0.012	0.75	Silverg, N.B. The epidemiology of Vitiligo. Curr. Derm. Rep. 4, 36-43 (2015).	Jin, Y. et al. Genome-wide association studies of autoimmune vitiligo identify 23 new risk loci and highlight key pathways and regulatory variants. Nature Genetics. 48(11), 1418-1424 (2016).
Endocrine	Body mass index	290	0.216	-	0.61-0.80	-	Nan, C. et al. Heritability of body mass index in pre-adolescence, young adulthood and late adulthood. European Journal of Epidemiology. 27, 247-253 (2012).
	Menarche (age at onset)	111	0.089	-	0.49	-	Towne, B. et al. Heritability of age at menarche in girls from the Fels longitudinal study. American Journal of Physical Anthropology. 128(1), 210-219 (2005).
	Obesity	41	0.026	0.2	0.7	Mokdad, A.H. et al. Prevalence of obesity, diabetes, and obesity-related health risk factors, 2001. JAMA. 289(1), 76-79 (2003).	Walley, A.J. et al. (2006). Genetics of obesity and the prediction of risk for health. Human Molecular Genetics. 15, R124-R130 (2006).
	Type 2 diabetes	87	0.065	0.08	0.30-0.67	Bradfield, J.P. et al. A genome-wide meta-analysis of six type 1 diabetes cohorts identifies multiple associated loci. PLOS Genetics. 7(9), e1002293 (2011).	Hara K. et al. Genetic architecture of type 2 diabetes. Biochemical and Biophysical Research communications. 452, 213-220 (2014).
Gastrointestinal	Digestive disease	273	0.117	0.0032	0.75	Molodecky, N.A. et al. Increasing incidence and prevalence of the inflammatory bowel diseases with time, based on systematic review. Gastroenterology. 142(1), 46-54 (2012).	Gordon, H. et al. Heritability in inflammatory bowel disease: from the first twin study to genome-wide association studies. Inflamm. Bowel Dis. 21(6), 1428-1434 (2015).
	Ulcerative colitis	118	0.086	0.0038	0.67	Molodecky, N.A. et al. Increasing incidence and prevalence of the inflammatory bowel diseases with time, based on systematic review. Gastroenterology. 142(1), 46-54 (2012).	Gordon, H. et al. Heritability in inflammatory bowel disease: from the first twin study to genome-wide association studies. Inflamm. Bowel Dis. 21(6), 1428-1434 (2015).
Hematological	Glycated hemoglobin levels	55	0.056	-	0.47-0.59	-	Fizelova, M. et al. Glycated hemoglobin levels are mostly dependent on nonglycemic parameters in 9398 finnish men without diabetes. The Journal of Clinical Endocrinology & Metabolism. 100(5), 1989-1996 (2015).
	Mean platelet volume	247	0.282	-	0.73	-	Qayyum, R. et al. A meta-analysis and genome-wide association study of platelet count and mean platelet volume in african americans. PLOS Genetics. 8(3), e1002491 (2011).
	Monocyte count	209	0.171	-	0.58	-	Lin, B.D. et al. Heritability and GWAS studies for monocyte-lymphocyte ratio. Twin Research and Human Genetics. 20(2), 97-107 (2017).
	Neutrophil traits	256	0.2	-	0.14-0.40	-	Nalls, M.A. et al. Multiple loci are associated with white blood cell phenotypes. PLOS Genetics. 7(6), e1002113 (2011).
	Red blood cell traits	49	0.914	-	0.40-0.90	-	Hodonsky, C.J. et al. Genome-wide association study of red blood cell traits in Hispanic/Latinos: The Hispanic Community Health Study / Study of Latinos. PLOS Genetics. 13(4), e1006760 (2017).
Immunological	Primary biliary cholangitis	49	0.059	0.0002	0.63*	Lleo, A. et al. Primary biliary cholangitis: a comprehensive overview. Hepatol Int. 11, 485-499 (2017).	Selmi, C. et al. Primary biliary cirrhosis in monozygotic and dizygotic twins: Genetics, epigenetics, and environment. Gastroenterology. 127(2), 485-492 (2004).
	Rheumatoid arthritis	103	0.215	0.01	0.53-0.68	Stahl, E.A. et al. Bayesian inference analyses of the polygenic architecture of rheumatoid arthritis. Nature genetics. 44 (5), 483-491 (2011).	Stahl, E.A. et al. Bayesian inference analyses of the polygenic architecture of rheumatoid arthritis. Nature genetics. 44 (5), 483-491 (2012).
	Systemic lupus erythematosus	79	0.167	0.0004	0.44-0.69	Conolly, J.J. and Hakonarson, H. Role of cytokines in systematic lupus erythematosus: recent progress from GWAS and Sequencing. Journal of Biomedicine and Biotechnology. Article ID 798924, 17 pages (2012).	Stahl, E.A. et al. Bayesian inference analyses of the polygenic architecture of rheumatoid arthritis. Nature genetics. 44 (5), 483-491 (2012).
	Type 1 diabetes	40	0.153	0.0033	0.88	Bradfield, J.P. et al. A genome-wide meta-analysis of six type 1 diabetes cohorts identifies multiple associated loci. PLOS Genetics. 7(9), e1002293 (2011).	Hyttinen, V. et al. Genetic liability of type 1 diabetes and the onset age among 22650 young finnish twin pairs. Diabetes. 52(4), 1052-1055 (2003).
Metabolic	Cholesterol	160	0.347	-	0.49-0.50	-	de Miranda-Chagas, S.V. et al. Environmental factors, familial aggregation and heritability of total cholesterol, low density lipoprotein-cholesterol and high density lipoprotein-cholesterol in a Brazilian population assisted by the Family Doctor program. Public Health. 125(6), 329-337 (2011).
	HDL	137	0.233	-	0.32-0.35	-	de Miranda-Chagas, S.V. et al. Environmental factors, familial aggregation and heritability of total cholesterol, low density lipoprotein-cholesterol and high density lipoprotein-cholesterol in a Brazilian population assisted by the Family Doctor program. Public Health. 125(6), 329-337 (2011).
	Triglycerides	87	0.221	-	0.47	-	Edwards, K.L. et al. Pleiotropic genetic effects on LDL size, plasma triglyceride, and HDL cholesterol in families. Arterioscle. Thromb. Vasc. Biol. 19, 2456-2464 (1999).
	Urate levels	36	0.184	-	0.6	-	Krishnan, E. et al. Nature versus nurture in gout: A twin study. The American Journal of Medicine. 125(5), 499-504 (2012)
Neurological	Migraine	45	0.008	0.14	0.5	Ran, C. et al. A replication study of GWAS findings in migraine identifies association in a Swedish case-control sample. BMC Medical Genetics. 15, 38 (2014).	Ran, C. et al. A replication study of GWAS findings in migraine identifies association in a Swedish case-control sample. BMC Medical Genetics. 15, 38 (2014).
	Parkinson's disease	60	0.041	0.002	0.27	Keller, M. et al. Using genome-wide complex trait analysis to quantify 'missing heritability' in Parkinson's disease. Human Molecular Genetics. 21 (22), 4996-5009 (2012).	Keller, M.F. et al. Using genome-wide complex trait analysis to quantify 'missing heritability' in Parkinson's disease. Human Molecular Genetics. 21(22), 4996-5009 (2012).
Psychiatric	Schizophrenia	119	0.016	0.0033	0.67	McGrath, J. et al. Schizophrenia: A concise overview of incidence, prevalence, and mortality. Epidemiology rev. 30, 67-76 (2008).	Jin, Y. et al. Genome-wide association studies of autoimmune vitiligo identify 23 new risk loci and highlight key pathways and regulatory variants. Nature Genetics. 48(11), 1418-1424 (2016).
Skeletal	Bone mineral density	63	0.112	-	0.53	-	François, S. et al. Heritability of bone mineral density. Revue du rhumatisme (English ed.). 66(3), 146-151 (1999).
	Height	346	0.263	-	0.83	-	Visscher, P.M. et al. Assumption-free estimation of heritability from genome-wide identity-by-descent sharing between full siblings. PLOS Genetics. 2(3), e41 (2006).
	Waist circumference	51	0.02	-	0.77	-	Wardle, J. et al. Evidence for a strong genetic influence on childhood adiposity despite the force of the obesogenic environment. The American Journal of Clinical Nutrition. 87(2), 398-404 (2008).
	Waist-related traits	46	0.018	-	0.77 **	-	Wardle, J. et al. Evidence for a strong genetic influence on childhood adiposity despite the force of the obesogenic environment. The American Journal of Clinical Nutrition. 87(2), 398-404 (2008).
	Waist-hip ratio	128	0.047	-	0.40-0.50	-	Sellers, T.A. et al. Familial aggregation and heritability of waist-to-hip ratio in adult women: the Iowa Women's Health Study. Int. J. Obes. Relat. Metab. Disord. 18(9), 607-613 (1994).
	Waist-to-hip related traits	94	0.058	-	0.40-0.50 **	-	Sellers, T.A. et al. Familial aggregation and heritability of waist-to-hip ratio in adult women: the Iowa Women's Health Study. Int. J. Obes. Relat. Metab. Disord. 18(9), 607-613 (1994).
